# Supplementary material for: Online Behaviours during the COVID-19 Pandemic and Their Associations with Psychological Factors: An International Exploratory Study
Source: MDPI journal article supplement (doi:10.3390/ijerph19148823), 2022-07-20
Supplement: s1 [file s1]

**Table S1.** Exact questions asked in the survey about self-reported mental illness, addictions, physical activity and IPEDs use.

|                                                                                                                                                                                                                                                                                                                                            |
|--------------------------------------------------------------------------------------------------------------------------------------------------------------------------------------------------------------------------------------------------------------------------------------------------------------------------------------------|
| <b>Self-reported mental illness</b>                                                                                                                                                                                                                                                                                                        |
| Do you suffer from any mental illness? [yes prior to physical distancing/yes since physical distancing/no]                                                                                                                                                                                                                                 |
| If yes, please select which apply<br><input type="radio"/> Anxiety<br><input type="radio"/> Depression<br><input type="radio"/> Other mood disorder(s)<br><input type="radio"/> Psychotic disease<br><input type="radio"/> Eating disorder<br><input type="radio"/> Personality disorder<br><input type="radio"/> Other                    |
| Has this period of physical distancing worsened your mental illness? [yes/no]                                                                                                                                                                                                                                                              |
| Have you ever struggled with addiction? (alcohol, drugs, gambling, etc.) [yes prior to physical distancing/yes since physical distancing/no]                                                                                                                                                                                               |
| If yes, has this physical distancing worsened your addiction problem? [yes/no]                                                                                                                                                                                                                                                             |
| <b>Alcohol use and smoking</b>                                                                                                                                                                                                                                                                                                             |
| Do you smoke or vape? [yes/no]                                                                                                                                                                                                                                                                                                             |
| Do you smoke/vape more than usual during physical distancing? [yes/no]                                                                                                                                                                                                                                                                     |
| Before physical distancing, how often did you have a drink containing alcohol?<br><input type="radio"/> Never<br><input type="radio"/> Monthly or less<br><input type="radio"/> 2-4 times a month<br><input type="radio"/> 2-3 times a week<br><input type="radio"/> 4 or more times a week                                                |
| How many units of alcohol did you drink on a typical day before physical distancing? (1 unit = a small glass of 13% wine, a single shot of 40% spirit, a pint of beer)<br><input type="radio"/> 1 or 2<br><input type="radio"/> 3 or 4<br><input type="radio"/> 5 or 6<br><input type="radio"/> 7 to 9<br><input type="radio"/> 10 or more |
| Since physical distancing, how often do you have a drink containing alcohol?<br><input type="radio"/> Never<br><input type="radio"/> Monthly or less<br><input type="radio"/> 2-4 times a month<br><input type="radio"/> 2-3 times a week<br><input type="radio"/> 4 or more times a week                                                  |
| Since physical distancing, how many units of alcohol do you drink on an average day? (1 unit = a small glass of 13% wine, a single shot of 40% spirit, a pint of beer)<br><input type="radio"/> 1 or 2<br><input type="radio"/> 3 or 4                                                                                                     |

|                                                                                                                               |
|-------------------------------------------------------------------------------------------------------------------------------|
| <input type="radio"/> 5 or 6<br><input type="radio"/> 7 to 9<br><input type="radio"/> 10 or more                              |
| <b>Physical activity</b>                                                                                                      |
| What kind of sport/fitness activity did you engage in before physical distancing?                                             |
| Are you a professional athlete? [yes/no]                                                                                      |
| Do you compete in your sport? (if yes, please state the professional body/hobby) [yes/no]                                     |
| How many minutes per week did you spend doing moderate activity or training before physical distancing?                       |
| For how many months had you been training at this intensity?                                                                  |
| How many minutes per week do you tend to spend doing moderate activity or training during this period of physical distancing? |
| Have you had a significant change in your fitness routine during this period? [yes/no]                                        |
| Have you experienced any injuries during this time due to exercise? [yes/no]                                                  |
| To what extent does fitness help you cope with the current situation? [0-10]                                                  |
| <b>IPEDs use</b>                                                                                                              |
| Have you ever taken supplements/products to help you reach your fitness goals/enhance your physical appearance? [yes/no]      |
| If yes, what were they?                                                                                                       |
| Where did you purchase them from during physical distancing?                                                                  |
| Have you ever asked medical supervision or professional advice on the intake of these products? [yes/no]                      |

**Table S2.** Cross-national differences in socio-demographic, psychological and behavioural characteristics.

|                                                  | UK          | Italy      | Spain       | Hungary     | Portugal    | Japan       | Brazil      | Lithuania  | <i>p</i> |
|--------------------------------------------------|-------------|------------|-------------|-------------|-------------|-------------|-------------|------------|----------|
|                                                  | n = 126     | n = 621    | n = 257     | n = 47      | n = 172     | n = 68      | n = 711     | n = 221    |          |
| Age                                              | 36.97±11.16 | 30.53±9.42 | 37.98±13.49 | 41.34±11.61 | 34.05±10.28 | 39.18±10.60 | 29.97±10.93 | 36.52±9.64 | <0.001   |
| <b>Sex</b>                                       |             |            |             |             |             |             |             |            | <0.001   |
| Men                                              | 45(35.7%)   | 190(30.6%) | 79(30.7%)   | 15(31.9%)   | 29(16.9%)   | 35(51.5%)   | 245(34.5%)  | 28(12.7%)  |          |
| Women                                            | 81(64.3%)   | 431(69.4%) | 178(69.3%)  | 32(68.1%)   | 143(83.1%)  | 33(48.5%)   | 466(65.5%)  | 193(87.3%) |          |
| <b>Occupation</b>                                |             |            |             |             |             |             |             |            | <0.001   |
| Employed                                         | 77(61.1%)   | 303(48.8%) | 132(51.4%)  | 32(68.1%)   | 70(40.7%)   | 59(86.8%)   | 188(26.4%)  | 176(79.6%) |          |
| Student                                          | 16(12.7%)   | 165(26.5%) | 51(19.8%)   | 2(4.3%)     | 46(26.7%)   | 6(8.8%)     | 400(56.3%)  | 23(10.4%)  |          |
| Unemployed                                       | 4(3.2%)     | 71(11.4%)  | 27(10.5%)   | 3(6.4%)     | 13(7.6%)    | 1(1.5%)     | 48(6.8%)    | 5(2.3%)    |          |
| Retired                                          | 2(1.6%)     | 80(12.9%)  | 8(3.1%)     | 2(4.3%)     | 1(0.6%)     | 0(0.0%)     | 12(1.7%)    | 0(0.0%)    |          |
| Freelance / individual activity                  | 27(21.4%)   | 2(0.3%)    | 39(15.2%)   | 8(17.0%)    | 42(24.4%)   | 2(2.9%)     | 63(8.9%)    | 17(7.7%)   |          |
| <b>Activity (Engaging in at least one sport)</b> |             |            |             |             |             |             |             |            | <0.001   |
|                                                  | 123(97.6%)  | 484(77.9%) | 212(82.5%)  | 45(95.7%)   | 143(83.1%)  | 56(82.4%)   | 711(100%)   | 171(77.4%) |          |
| <b>Mental Illness</b>                            |             |            |             |             |             |             |             |            | <0.001   |
| Anxiety                                          | 25(80.6%)   | 67(48.9%)  | 40(76.9%)   | 3(60.0%)    | 24(64.9%)   | 3(37.5%)    | 370(86.9%)  | 12(60.0%)  | <0.001   |
| Depression                                       | 18(58.1%)   | 23(16.8%)  | 10(19.2%)   | 2(40.0%)    | 7(18.9%)    | 1(12.5%)    | 136(31.9%)  | 10(50.0%)  | <0.001   |
| Addiction+ smoking                               | 26(20.6%)   | 233(37.5%) | 63(24.5%)   | 10(21.3%)   | 25(14.5%)   | 6(8.8%)     | 122(17.2%)  | 46(20.8%)  | <0.001   |
| <b>Appearance anxiety inventory</b>              |             |            |             |             |             |             |             |            | <0.001   |
|                                                  | 16.09±5.47  | 16.28±5.25 | 14.78±4.08  | 16.62±4.94  | 16.37±5.22  | 16.01±4.81  | 18.55±6.24  | 16.30±4.55 |          |
| <b>Self-compassion scale</b>                     |             |            |             |             |             |             |             |            | <0.001   |
|                                                  | 29.79±6.52  | 29.79±5.18 | 32.43±5.65  | 33.43±7.02  | 33.10±5.49  | 32.97±5.58  | 29.99±6.44  | 33.45±5.64 |          |
| <b>Image and performance enhancing drugs use</b> |             |            |             |             |             |             |             |            | <0.001   |
|                                                  | 36(28.6%)   | 132(21.3%) | 41(16.0%)   | 27(57.4%)   | 50(29.1%)   | 31(45.6%)   | 329(46.3%)  | 78(35.3%)  |          |

**Table S3.** Cross-national differences in time spent online and specific online behaviours during the start of the COVID-19 pandemic.

|                            | UK        | Italy     | Spain     | Hungary   | Portugal  | Japan     | Brazil    | Lithuania |        |              |              |              |
|----------------------------|-----------|-----------|-----------|-----------|-----------|-----------|-----------|-----------|--------|--------------|--------------|--------------|
|                            | n = 126   | n = 621   | n = 257   | n = 47    | n = 172   | n = 68    | n = 711   | n = 221   | p      | p*           |              |              |
|                            | 1         | 2         | 3         | 4         | 5         | 6         | 7         | 8         |        |              |              |              |
| <b>Internet activities</b> |           |           |           |           |           |           |           |           |        |              |              |              |
| General Surfing            | 3.21±1.06 | 3.53±0.94 | 3.24±0.99 | 2.81±1.10 | 2.93±0.90 | 3.62±0.98 | 3.49±1.00 | 3.05±1.02 | <0.001 | 2:3(0.001);  | 2:4(<0.001); | 2:5(<0.001); |
|                            |           |           |           |           |           |           |           |           |        | 2:8(<0.001); | 3:5(0.001);  | 3:7(<0.001); |
|                            |           |           |           |           |           |           |           |           |        | 4:6(<0.001); | 4:7(<0.001); | 5:6(<0.001); |
|                            |           |           |           |           |           |           |           |           |        | 5:7(<0.001); | 6:8(<0.001); | 7:8(<0.001)  |
| Massively-                 | 1.42±0.90 | 1.59±1.11 | 1.47±0.91 | 1.13±0.49 | 1.34±0.74 | 1.44±0.94 | 1.71±1.16 | 1.23±0.63 | <0.001 | 2:8(<0.001); | 4:7(<0.001); | 5:7(<0.001); |
| Multiplayer-Online-        |           |           |           |           |           |           |           |           |        | 7:8(<0.001)  |              |              |
| Role-Playing-Games         |           |           |           |           |           |           |           |           |        |              |              |              |
| Skill games & Time         | 1.99±1.21 | 2.16±1.22 | 2.32±1.21 | 1.79±1.18 | 1.72±0.98 | 1.79±1.07 | 1.95±1.24 | 1.78±1.08 | <0.001 | 2:5(<0.001); | 2:7(<0.001); | 2:8(<0.001); |
| wasters                    |           |           |           |           |           |           |           |           |        | 3:5(<0.001); | 3:6(0.001);  | 3:7(<0.001); |
|                            |           |           |           |           |           |           |           |           |        | 3:8(<0.001)  |              |              |
| Internet gaming            | 1.65±1.08 | 1.49±0.90 | 1.53±0.88 | 1.28±0.74 | 1.52±0.95 | 1.51±0.91 | 1.79±1.13 | 1.29±0.68 | <0.001 | 2:7(<0.001); | 4:7(<0.001); | 5:7(0.001);  |
|                            |           |           |           |           |           |           |           |           |        | 7:8(<0.001)  |              |              |
| Online Shopping            | 2.54±1.00 | 2.32±0.99 | 2.04±0.96 | 2.21±0.81 | 2.13±0.93 | 2.91±0.99 | 2.46±1.08 | 2.50±0.99 | <0.001 | 1:3(<0.001); | 1:5(<0.001); | 2:3(<0.001); |
|                            |           |           |           |           |           |           |           |           |        | 2:6(<0.001); | 3:6(<0.001); | 3:7(<0.001)  |
|                            |           |           |           |           |           |           |           |           |        | 3:8(<0.001); | 4:6(<0.001); | 5:6(<0.001); |
|                            |           |           |           |           |           |           |           |           |        | 5:7(<0.001); | 5:8(<0.001); | 6:7(<0.001)  |
| Online gambling            | 1.13±0.53 | 1.05±0.34 | 1.05±0.34 | 1.19±0.61 | 1.08±0.37 | 1.10±0.39 | 1.11±0.45 | 1.04±0.23 | 0.003  | 2:7(0.001)   |              |              |
| Social networking          | 3.66±0.93 | 3.89±0.99 | 3.55±1.17 | 2.98±1.05 | 3.59±0.92 | 3.41±1.10 | 3.94±1.07 | 3.48±1.02 | <0.001 | 1:4(<0.001); | 1:7(<0.001); | 2:3(<0.001); |
|                            |           |           |           |           |           |           |           |           |        | 2:4(<0.001); | 2:5(<0.001); | 2:6(<0.001); |
|                            |           |           |           |           |           |           |           |           |        | 2:8(<0.001); | 3:4(<0.001); | 3:7(<0.001); |
|                            |           |           |           |           |           |           |           |           |        | 4:7(<0.001); | 5:7(<0.001); | 6:7(<0.001); |
|                            |           |           |           |           |           |           |           |           |        | 7:8(<0.001)  |              |              |

|                                                                                                 |           |           |           |           |           |           |           |           |        |                                                              |                                              |                                                              |
|-------------------------------------------------------------------------------------------------|-----------|-----------|-----------|-----------|-----------|-----------|-----------|-----------|--------|--------------------------------------------------------------|----------------------------------------------|--------------------------------------------------------------|
| Sports                                                                                          | 1.95±1.17 | 2.47±1.34 | 2.37±1.31 | 2.49±1.33 | 2.27±1.16 | 1.79±1.17 | 2.18±1.18 | 2.17±1.21 | <0.001 | 1:2(<0.001);<br>3:6(<0.001)                                  | 2:6(<0.001);                                 | 2:7(<0.001);                                                 |
| Pornography<br>viewing                                                                          | 1.79±1.11 | 2.09±1.18 | 1.54±0.86 | 1.57±0.95 | 1.46±0.87 | 1.74±1.07 | 2.06±1.18 | 1.32±0.67 | <0.001 | 1:8(<0.001);<br>2:8(<0.001);<br>7:8(<0.001)                  | 2:3(<0.001);<br>3:7(<0.001);                 | 2:5(<0.001);<br>5:7(<0.001);                                 |
| Streaming                                                                                       | 3.06±1.27 | 3.64±1.07 | 2.92±1.25 | 2.47±1.14 | 3.09±1.15 | 3.06±1.11 | 3.80±1.14 | 3.05±1.07 | <0.001 | 1:2(<0.001);<br>2:4(<0.001);<br>2:8(<0.001);<br>5:7(<0.001); | 1:7(<0.001);<br>2:5(<0.001);<br>3:7(<0.001); | 2:3(<0.001);<br>2:6(<0.001);<br>4:7(<0.001);<br>6:7(<0.001); |
| Digital Hoarding                                                                                | 1.70±0.97 | 1.84±1.02 | 2.31±1.11 | 1.49±0.80 | 2.08±1.12 | 1.93±1.12 | 2.40±1.26 | 1.66±0.92 | <0.001 | 1:3(<0.001);<br>2:7(<0.001);<br>4:5(0.001);<br>6:7(.002);    | 1:7(<0.001);<br>3:4(<0.001);<br>4:7(<0.001); | 2:3(<0.001);<br>3:8(<0.001);<br>5:8(<0.001);<br>7:8(<0.001)  |
| Cyberchondria                                                                                   | 1.64±1.00 | 1.50±0.86 | 1.64±0.87 | 1.47±0.75 | 1.53±0.90 | 1.41±0.76 | 1.91±1.09 | 1.70±0.87 | <0.001 | 2:7(<0.001);<br>5:7(<0.001);                                 | 2:8(<0.001);                                 | 3:7(0.001);                                                  |
| Browsing online<br>hours per day<br>during periods of<br>increased social/<br>physical distance | 6.20±3.80 | 5.54±3.01 | 4.12±2.65 | 5.30±3.92 | 5.72±3.77 | 4.28±2.60 | 5.28±3.75 | 4.26±2.81 | <0.001 | 1:3(<0.001);<br>2:3(<0.001);<br>2:8(<0.001);<br>5:8(<0.001); | 1:6(<0.001);<br>2:6(<0.001);<br>3:5(<0.001); | 1:8(<0.001);<br>2:7(<0.001);<br>3:7(<0.001);                 |

Note: \* Comparison between two countries.

**Table S4.** Mean scores of appearance anxiety self-compassion measures and time spent online across countries.

|            | Lithuania  | Hungary    | Spain      | Italy      | UK         | Portugal   | Japan      | Brazil     | F            | p            |
|------------|------------|------------|------------|------------|------------|------------|------------|------------|--------------|--------------|
| AAI        | 16.30±4.55 | 16.62±4.94 | 14.78±4.08 | 16.28±5.25 | 16.09±5.47 | 16.37±5.22 | 16.01±4.81 | 18.55±6.24 | <b>17.61</b> | <b>0.000</b> |
| Global SCS | 33.45±5.64 | 33.43±7.02 | 32.43±5.65 | 29.79±5.18 | 29.79±6.52 | 33.10±5.49 | 32.97±5.58 | 29.99±6.44 | <b>20.65</b> | <b>0.000</b> |
| Hours      | 4.26±2.81  | 5.30±3.92  | 4.12±2.65  | 5.54±3.01  | 6.20±3.80  | 5.72±3.77  | 4.28±2.60  | 5.28±3.75  | <b>10.28</b> | <b>0.000</b> |

**Table S5.** Cross cultural comparisons of time spent online, appearance anxiety and self-compassion measures.

| Multiple Comparisons |         |             |             |                       |            |       |                         |             |
|----------------------|---------|-------------|-------------|-----------------------|------------|-------|-------------------------|-------------|
| Dependent Variable   |         | (I) Country | (J) Country | Mean Difference (I-J) | Std. Error | Sig.  | 95% Confidence Interval |             |
|                      |         |             |             |                       |            |       | Lower Bound             | Upper Bound |
| AAI                  | Tahmane | Lithuania   | Spain       | 1.521                 | 0.398      | 0.004 | 0.27                    | 2.77        |
|                      |         |             | Brazil      | -2.251                | 0.385      | 0.000 | -3.46                   | -1.04       |
|                      |         | Hungary     | -           | -                     | -          | -     | -                       | -           |
|                      |         |             | -           | -                     | -          | -     | -                       | -           |
|                      |         | Spain       | Lithuania   | -1.521                | 0.398      | 0.004 | -2.77                   | -0.27       |
|                      |         |             | Italy       | -1.495                | 0.330      | 0.000 | -2.53                   | -0.46       |
|                      |         |             | Portugal    | -1.590                | 0.472      | 0.024 | -3.07                   | -0.11       |
|                      |         |             | Brazil      | -3.772                | 0.346      | 0.000 | -4.85                   | -2.69       |
|                      |         | Italy       | Spain       | 1.495                 | 0.330      | 0.000 | 0.46                    | 2.53        |
|                      |         |             | Brazil      | -2.277                | 0.315      | 0.000 | -3.26                   | -1.29       |
|                      |         | UK          | Brazil      | -2.467                | 0.541      | 0.000 | -4.18                   | -0.76       |
|                      |         | Portugal    | Spain       | 1.590                 | 0.472      | 0.024 | 0.11                    | 3.07        |
|                      |         |             | Brazil      | -2.182                | 0.461      | 0.000 | -3.63                   | -0.73       |
|                      |         | Japan       | Brazil      | -2.539                | 0.629      | 0.003 | -4.56                   | -0.52       |
|                      |         | Brazil      | Lithuania   | 2.251                 | 0.385      | 0.000 | 1.04                    | 3.46        |
|                      |         |             | Spain       | 3.772                 | 0.346      | 0.000 | 2.69                    | 4.85        |
|                      |         |             | Italy       | 2.277                 | 0.315      | 0.000 | 1.29                    | 3.26        |
|                      |         |             | UK          | 2.467                 | 0.541      | 0.000 | 0.76                    | 4.18        |
|                      |         |             | Portugal    | 2.182                 | 0.461      | 0.000 | 0.73                    | 3.63        |
|                      |         |             | Japan       | 2.539                 | 0.629      | 0.003 | 0.52                    | 4.56        |
| SCS                  | Tahmane | Lithuania   | Italy       | 3.663                 | 0.432      | 0.000 | 2.31                    | 5.02        |
|                      |         |             | UK          | 3.659                 | 0.694      | 0.000 | 1.47                    | 5.85        |
|                      |         |             | Brazil      | 3.461                 | 0.450      | 0.000 | 2.05                    | 4.87        |
|                      |         | Hungary     | Italy       | 3.636                 | 1.045      | 0.029 | 0.20                    | 7.08        |
|                      |         | Spain       | Italy       | 2.639                 | 0.409      | 0.000 | 1.36                    | 3.92        |
|                      |         |             | UK          | 2.634                 | 0.680      | 0.004 | 0.49                    | 4.78        |
|                      |         |             | Brazil      | 2.436                 | 0.427      | 0.000 | 1.10                    | 3.78        |
|                      |         | Italy       | Lithuania   | -3.663                | 0.432      | 0.000 | -5.02                   | -2.31       |
|                      |         |             | Hungary     | -3.636                | 1.045      | 0.029 | -7.08                   | -0.20       |
|                      |         |             | Spain       | -2.639                | 0.409      | 0.000 | -3.92                   | -1.36       |
|                      |         |             | Portugal    | -3.310                | 0.467      | 0.000 | -4.78                   | -1.84       |
|                      |         |             | Japan       | -3.182                | 0.707      | 0.001 | -5.46                   | -0.90       |
|                      |         | UK          | Lithuania   | -3.659                | 0.694      | 0.000 | -5.85                   | -1.47       |
|                      |         |             | Spain       | -2.634                | 0.680      | 0.004 | -4.78                   | -0.49       |
|                      |         |             | Portugal    | -3.305                | 0.716      | 0.000 | -5.56                   | -1.05       |
|                      |         |             | Japan       | -3.177                | 0.892      | 0.014 | -6.00                   | -0.35       |
|                      |         | Portugal    | Italy       | 3.310                 | 0.467      | 0.000 | 1.84                    | 4.78        |
|                      |         |             | UK          | 3.305                 | 0.716      | 0.000 | 1.05                    | 5.56        |

|       |         |           |           |          |         |       |         |         |
|-------|---------|-----------|-----------|----------|---------|-------|---------|---------|
| Hours | Tahmane | Japan     | Brazil    | 3.107    | 0.483   | 0.000 | 1.59    | 4.63    |
|       |         |           | Italy     | 3.182    | 0.707   | 0.001 | 0.90    | 5.46    |
|       |         |           | UK        | 3.177    | 0.892   | 0.014 | 0.35    | 6.00    |
|       |         |           | Brazil    | 2.979    | 0.718   | 0.002 | 0.67    | 5.29    |
|       |         | Brazil    | Lithuania | -3.461   | 0.450   | 0.000 | -4.87   | -2.05   |
|       |         |           | Spain     | -2.436   | 0.427   | 0.000 | -3.78   | -1.10   |
|       |         |           | Portugal  | -3.107   | 0.483   | 0.000 | -4.63   | -1.59   |
|       |         |           | Japan     | -2.979   | 0.718   | 0.002 | -5.29   | -0.67   |
|       |         | Lithuania | Italy     | -1.27967 | 0.22439 | 0.000 | -1.9835 | -0.5758 |
|       |         |           | UK        | -1.93488 | 0.38788 | 0.000 | -3.1598 | -0.7100 |
|       |         |           | Portugal  | -1.46057 | 0.34424 | 0.001 | -2.5428 | -0.3783 |
|       |         |           | Brazil    | -1.02233 | 0.23566 | 0.000 | -1.7608 | -0.2838 |
|       |         | Hungary   | -         | -        | -       | -     | -       | -       |
| Hours | Tahmane | Spain     | Italy     | -1.41641 | 0.20485 | 0.000 | -2.0580 | -0.7748 |
|       |         |           | UK        | -2.07162 | 0.37691 | 0.000 | -3.2633 | -0.8799 |
|       |         |           | Portugal  | -1.59731 | 0.33183 | 0.000 | -2.6414 | -0.5533 |
|       |         |           | Brazil    | -1.15907 | 0.21713 | 0.000 | -1.8386 | -0.4795 |
|       |         | Italy     | Lithuania | 1.27967  | 0.22439 | 0.000 | 0.5758  | 1.9835  |
|       |         |           | Spain     | 1.41641  | 0.20485 | 0.000 | 0.7748  | 2.0580  |
|       |         |           | Japan     | 1.26062  | 0.33711 | 0.009 | 0.1772  | 2.3441  |
|       |         | UK        | Lithuania | 1.93488  | 0.38788 | 0.000 | 0.7100  | 3.1598  |
|       |         |           | Spain     | 2.07162  | 0.37691 | 0.000 | 0.8799  | 3.2633  |
|       |         |           | Japan     | 1.91583  | 0.46232 | 0.001 | 0.4535  | 3.3782  |
|       |         | Portugal  | Lithuania | 1.46057  | 0.34424 | 0.001 | 0.3783  | 2.5428  |
|       |         |           | Spain     | 1.59731  | 0.33183 | 0.000 | 0.5533  | 2.6414  |
|       |         |           | Japan     | 1.44152  | 0.42637 | 0.025 | 0.0924  | 2.7906  |
|       |         | Japan     | Italy     | -1.26062 | 0.33711 | 0.009 | -2.3441 | -0.1772 |
|       |         |           | UK        | -1.91583 | 0.46232 | 0.001 | -3.3782 | -0.4535 |
|       |         |           | Portugal  | -1.44152 | 0.42637 | 0.025 | -2.7906 | -0.0924 |
|       |         | Brazil    | Lithuania | 1.02233  | 0.23566 | 0.000 | 0.2838  | 1.7608  |
|       |         |           | Spain     | 1.15907  | 0.21713 | 0.000 | 0.4795  | 1.8386  |

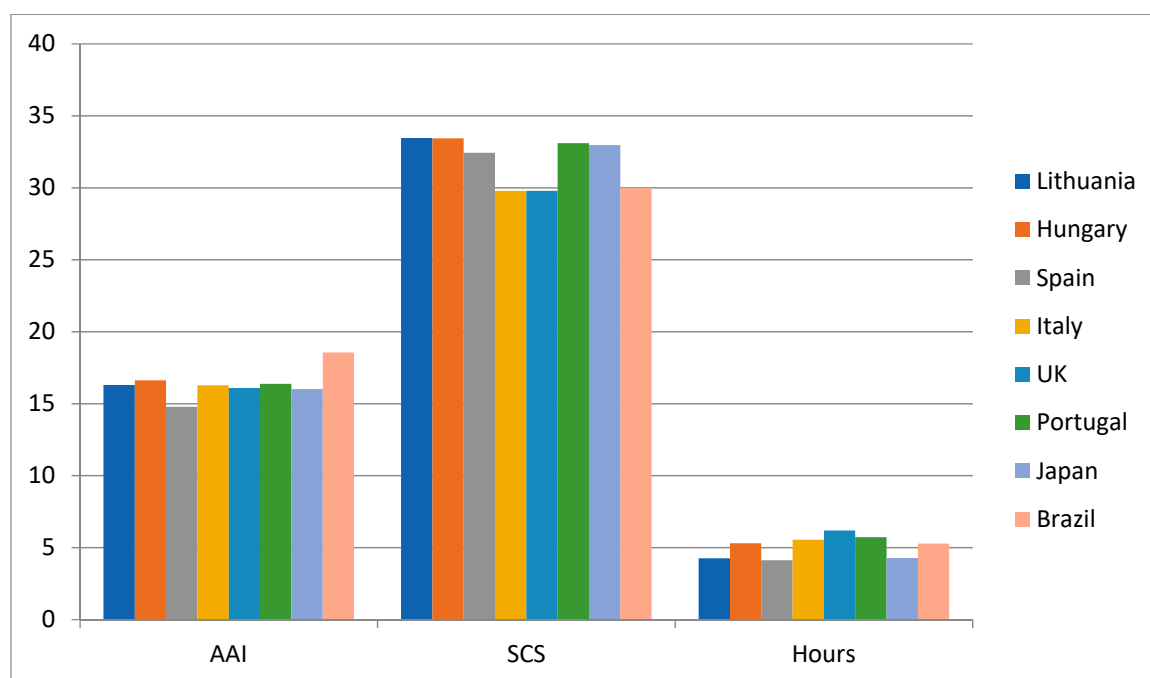

**Figure S1.** Appearance anxiety, self-compassion measures and time spent online in different countries.
